# Supplementary material for: A humanized minipig model for the toxicological testing of therapeutic recombinant antibodies
Source: Springer Nature journal article supplement (doi:10.1038/s41551-022-00921-2), 2022-09-22

**Figure 2a Uncropped Blots**

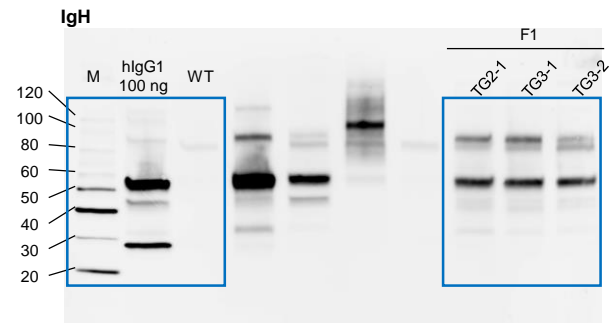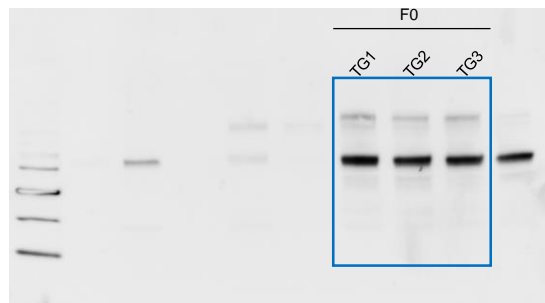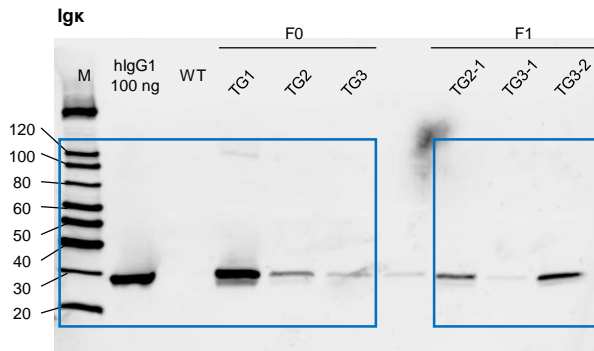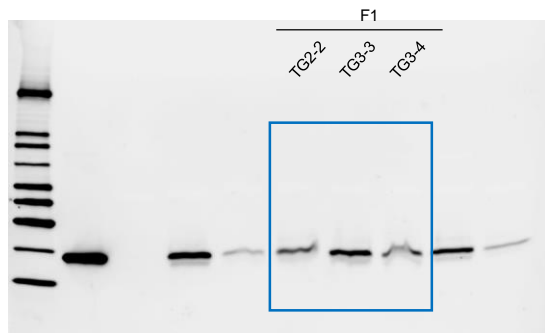

Supplement: 41551_2022_921_MOESM4_ESM.pdf [file 41551_2022_921_MOESM4_ESM.pdf]
